# Supplementary material
Source: Elsevier journal article supplement (https://scholar.harvard.edu/files/steven-meisler/files/mmc1.docx)
Supplement: mmc1 [file mmc1.docx]

# Supplementary Materials

**Tract Profile Analysis**

Recently, tract profiles have been proposed as a more sensitive method to analyze microstructural properties of a fiber bundle [(Yeatman et al., 2012b).](#_bookmark134) For this analysis, FA values were mapped to segments of reconstructed tract streamlines. To make the streamlines for each tract, we fed the FOD peaks into *TractSeg* to create binary masks of the tract, the ROIs that define its endpoint, and a corresponding tracking output map (TOM) [(Wasserthal et al., 2018b).](#_bookmark127) These were used as inputs to *TractSeg’s* pre-trained convolutional neural network [(Wasserthal et al., 2019,](#_bookmark128) [2020).](#_bookmark129) We generated a fixed large number (5000) of fibers per instance to account for the stochastic nature of reconstruction. This reduces inter-run variability. Using an approach based on *Dipy*’s Bundle Analytics framework [(Chandio et al.,](#_bookmark26) [2020),](#_bookmark26) FA values were calculated for 100 nodes along the length of the tract. At each node, we used pre-compiled *TractSeg* code to employ a non-parametric permutation-based statistical comparison [(Nichols and Holmes, 2002)](#_bookmark79) with 5000 iterations to look for either correlations (Pearson’s *r*) between node FA and standardized TOWRE composite scores, or group differences (two-sample *t*-test) between group FA values. This permutation approach accounts for multiple comparisons *within* a tract given the correlative structure between adjacent nodes [(Yeatman et al., 2012b).](#_bookmark134) We additionally imposed FWE correction for multiple comparisons *between* the 20 tracts, after correcting for within-tract comparisons. Covariate choices for group and correlation tests were the same as in the tract-averaged analyses. No correlations between node FA and composite TOWRE scores were significant after within-tract multiple comparison correction. Small regions of TR > RD were present in the left SLF and UF after correcting for multiple comparisons within-tract. These did not survive between-tract multiple hypothesis correction, however (Figure S1).

Figure S1: Significant tract-profile group comparison analyses. FA residuals for the TR and RD group are plotted as a function of position along the fiber bundle, after regressing out sex, age, handedness, global fractional anisotropy, and sex-group interactions. Shaded regions surrounding the curves denote 90% confidence intervals. The red dotted line extends above the curves at any segment where the two-sample *t*-test is significant after FWE correction within the tract Below each plot, the FWE-corrected alpha threshold (correcting for the 100 analyses within each tract), highest test coefficient achieved, and its associated p-value are listed. Accompanying each plot, tracts are highlighted red at significant segments. Tract shapes come from a single participant. SLF: superior longitudinal fasciculus, UF: uncinate fasciculus.

**Supplemental References**

Bramsh Qamar Chandio, Shannon Leigh Risacher, Franco Pestilli, Daniel Bullock, Fang-Cheng Yeh, Serge Koudoro, Ariel Rokem, Jaroslaw Harezlak, and Eleftherios Garyfallidis. Bundle analytics, a computational framework for investigating the shapes and profiles of brain pathways across populations. *Scientific reports*, 10(1):1–18, 2020.

Thomas E Nichols and Andrew P Holmes. Nonparametric permutation tests for functional neuroimaging: a primer with examples. *Human brain mapping*, 15(1):1–25, 2002.

Franck Ramus, Irene Altarelli, Katarzyna Jednoróg, Jingjing Zhao, and Lou Scotto Di Covella. Neuroanatomy of developmental dyslexia: Pitfalls and promise. *Neuroscience & Biobehavioral Reviews*, 84:434–452, 2018.

Jakob Wasserthal, Peter F Neher, and Klaus H Maier-Hein. Tract orientation mapping for bundle-specific tractography. In *International Conference on Medical Image Computing and Computer-Assisted Intervention*, pages 36–44. Springer, 2018.

Jakob Wasserthal, Peter F Neher, Dusan Hirjak, and Klaus H Maier-Hein. Combined tract segmentation and orientation mapping for bundle-specific tractography. *Medical image analysis*, 58:101559, 2019.

Jakob Wasserthal, Klaus H Maier-Hein, Peter F Neher, Georg Northoff, Katharina M Kubera, Stefan Fritze, Anais Harneit, Lena S Geiger, Heike Tost, Robert C Wolf, et al. Multiparametric mapping of white matter microstructure in catatonia. *Neuropsychopharmacology*, 45(10):1750–1757, 2020.

Jason D Yeatman, Robert F Dougherty, Nathaniel J Myall, Brian A Wandell, and Heidi M Feldman. Tract profiles of white matter properties: automating fiber-tract quantification. *PloS one*, 7(11):e49790, 2012.
